# Supplementary material
Source: publisher site journal article supplement (https://www.spandidos-publications.com/1436/downloadSupplementary)

Figure S1. Expression levels of NPBWR1-2 in four ovarian cancer cell lines following NPBWR1-2 overexpression. Cells were transfected with an NPBWR1-2 overexpression vector or a nonsense pcDNA3.1 control vector. \* $P < 0.05$ , \*\*\* $P < 0.001$  and \*\*\*\* $P < 0.0001$ . NPBWR1-2, neuropeptides B and W receptor 1-2; NC, negative control.

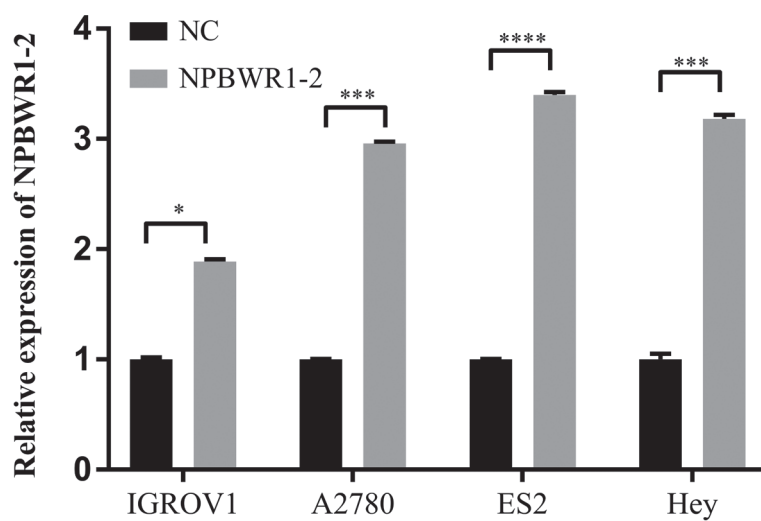

Figure S2. NPBWR1-2 overexpression decreases cell viability in five ovarian cancer cell lines. \*\*\* $P < 0.001$  and \*\*\*\* $P < 0.0001$ . NPBWR1-2, neuropeptides B and W receptor 1-2; lncRNA, long non-coding RNA; NC, negative control.

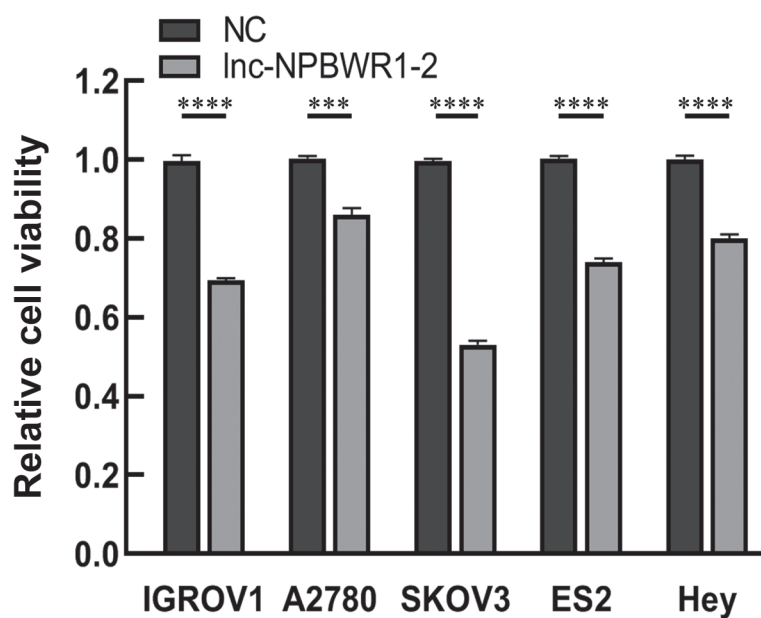

Supplement: Supplementary file 1 [file downloadSupplementary]
